# Supplementary material for: Inflammatory lesions and brain tumors: is it possible to differentiate them based on texture features in magnetic resonance imaging?
Source: PubMed Central journal article supplement (PMC7473508; doi:10.1590/1678-9199-jvatitd-2020-0011), 2020-09-04
Supplement: 1678-9199-jvatitd-26-e20200011-s1.pdf [file 1678-9199-jvatitd-26-e20200011-s1.pdf]

## Supplementary Material to “Inflammatory lesions and brain tumors: is it possible to differentiate them based on texture features in magnetic resonance imaging?”

**Additional file 1.** Complete list of patients with inflammatory lesions including their ages, gender, and diagnostic evaluation.

| <b>Patients</b> | <b>Age</b> | <b>Gender</b> | <b>Edema</b> | <b>Diagnosis</b>                           | <b>Confirmation</b>                                              |
|-----------------|------------|---------------|--------------|--------------------------------------------|------------------------------------------------------------------|
| <b>1</b>        | 40         | M             | Marked       | Toxoplasmosis                              | Biopsy                                                           |
| <b>2</b>        | 59         | F             | Marked       | Cryptococcosis                             | Biopsy                                                           |
| <b>3</b>        | 20         | F             | Marked       | Moderate neuromyelitis                     | CFS                                                              |
| <b>4</b>        | 56         | F             | Marked       | Neurocysticercosis                         | *                                                                |
| <b>5</b>        | 45         | F             | Marked       | Pyogenic abscess                           | Biopsy and culture                                               |
| <b>6</b>        | 43         | F             | Marked       | Aspergillosis                              | Biopsy                                                           |
| <b>7</b>        | 62         | F             | Marked       | Aspergillosis                              | Biopsy                                                           |
| <b>8</b>        | 15         | F             | Mild         | Multiple sclerosis                         | Dissemination in time and space + CSF analysis                   |
| <b>9</b>        | 41         | F             | Mild         | Septic emboli                              | Clinical and radiological correlation and radiological evolution |
| <b>10</b>       | 37         | F             | Marked       | Tuberculosis                               | Biopsy                                                           |
| <b>11</b>       | 37         | M             | Marked       | Toxoplasmosis                              | Biopsy                                                           |
| <b>12</b>       | 5          | M             | Marked       | Pyogenic abscess                           | Biopsy and culture                                               |
| <b>13</b>       | 41         | F             | Marked       | Toxoplasmosis                              | Biopsy                                                           |
| <b>14</b>       | 32         | F             | Marked       | Neurocysticercosis                         | *                                                                |
| <b>15</b>       | 32         | F             | Marked       | Toxoplasmosis                              | Biopsy                                                           |
| <b>16</b>       | 45         | F             | Mild         | Neurocysticercosis                         | *                                                                |
| <b>17</b>       | 56         | M             | Marked       | Progressive multifocal leukoencephalopathy | Biopsy                                                           |

| <b>Patients</b> | <b>Age</b> | <b>Gender</b> | <b>Edema</b> | <b>Diagnosis</b>   | <b>Confirmation</b>                                              |
|-----------------|------------|---------------|--------------|--------------------|------------------------------------------------------------------|
| <b>18</b>       | 25         | M             | Mild         | Septic emboli      | Clinical and radiological correlation and radiological evolution |
| <b>19</b>       | 24         | F             | Mild         | Multiple sclerosis | Dissemination in time and space + CSF analysis                   |
| <b>20</b>       | 52         | M             | Mild         | Toxoplasmosis      | Biopsy                                                           |
| <b>21</b>       | 41         | F             | Mild         | Toxoplasmosis      | Biopsy                                                           |
| <b>22</b>       | 43         | M             | Mild         | Pyogenic abscess   | Biopsy                                                           |
| <b>23</b>       | 18         | F             | Mild         | Multiple sclerosis | Dissemination in time and space + CSF analysis                   |
| <b>24</b>       | 29         | F             | Mild         | Cryptococcosis     | CSF                                                              |
| <b>25</b>       | 44         | F             | Mild         | Toxoplasmosis      | Biopsy                                                           |
| <b>26</b>       | 42         | M             | Mild         | Toxoplasmosis      | Biopsy                                                           |
| <b>27</b>       | 33         | M             | Mild         | Tuberculosis       | CSF                                                              |
| <b>28</b>       | 36         | F             | Mild         | Tuberculosis       | CSF                                                              |
| <b>29</b>       | 65         | M             | Marked       | Tuberculosis       | Biopsy                                                           |
| <b>30</b>       | 53         | F             | Marked       | Vasculitis         | Biopsy                                                           |

\*Single or multiple active parenchymal cysts, with at least one cyst with scolex on MRI.
