# Supplementary material for: Inflammatory lesions and brain tumors: is it possible to differentiate them based on texture features in magnetic resonance imaging?
Source: PubMed Central journal article supplement (PMC7473508; doi:10.1590/1678-9199-jvatitd-2020-0011), 2020-09-04
Supplement: 1678-9199-jvatitd-26-e20200011-s2.pdf [file 1678-9199-jvatitd-26-e20200011-s2.pdf]

## Supplementary Material to “Inflammatory lesions and brain tumors: is it possible to differentiate them based on texture features in magnetic resonance imaging?”

**Additional file 2.** Complete list of patients with tumors including their ages, gender, and diagnostic evaluation.

| <b>Patient</b> | <b>Age</b> | <b>Gender</b> | <b>Edema</b> | <b>Diagnosis</b>      |
|----------------|------------|---------------|--------------|-----------------------|
| 1              | 48         | F             | Marked       | Glioblastoma          |
| 2              | 40         | F             | Mild         | Glioblastoma          |
| 3              | 76         | F             | Marked       | Glioblastoma          |
| 4              | 45         | M             | Mild         | Glioblastoma          |
| 5              | 31         | M             | Mild         | Glioblastoma          |
| 6              | 68         | M             | Mild         | Grade III astrocytoma |
| 7              | 22         | F             | Mild         | Grade II astrocytoma  |
| 8              | 37         | M             | Mild         | Ependymoma            |
| 9              | 54         | M             | Marked       | Glioblastoma          |
| 10             | 55         | M             | Marked       | Glioblastoma          |
| 11             | 50         | M             | Mild         | Gliosarcoma           |
| 12             | 53         | F             | Marked       | Glioblastoma          |
| 13             | 17         | F             | Mild         | Grade II astrocytoma  |
| 14             | 67         | M             | Mild         | Grade II astrocytoma  |
| 15             | 74         | F             | Marked       | Glioblastoma          |
| 16             | 35         | F             | Mild         | Grade III astrocytoma |
| 17             | 52         | F             | Mild         | Glioblastoma          |
| 18             | 45         | M             | Mild         | Glioblastoma          |
| 19             | 67         | M             | Mild         | Glioblastoma          |
| 20             | 76         | M             | Mild         | Grade III astrocytoma |
| 21             | 52         | F             | Marked       | Grade III astrocytoma |
| 22             | 67         | F             | Marked       | Gliosarcoma           |
| 23             | 42         | F             | Mild         | Grade III astrocytoma |
| 24             | 58         | M             | Mild         | Grade II astrocytoma  |
| 25             | 34         | F             | Mild         | Grade II astrocytoma  |
| 26             | 35         | F             | Mild         | Grade II astrocytoma  |
| 27             | 32         | M             | Mild         | Grade II astrocytoma  |
| 28             | 23         | F             | Mild         | Grade II astrocytoma  |
| 29             | 58         | M             | Mild         | Grade III astrocytoma |
| 30             | 45         | M             | Mild         | Grade III astrocytoma |
| 31             | 31         | F             | Mild         | Grade III astrocytoma |
| 32             | 31         | M             | Mild         | Grade III astrocytoma |

| <b>Patient</b> | <b>Age</b> | <b>Gender</b> | <b>Edema</b> | <b>Diagnosis</b>      |
|----------------|------------|---------------|--------------|-----------------------|
| <b>33</b>      | 39         | M             | Mild         | Grade III astrocytoma |
| <b>34</b>      | 77         | M             | Marked       | Grade III astrocytoma |
| <b>35</b>      | 56         | F             | Mild         | Glioblastoma          |
| <b>36</b>      | 28         | m             | Marked       | Glioblastoma          |
| <b>37</b>      | 21         | F             | Marked       | Glioblastoma          |
